# Supplementary material
Source: HighWire-hosted journal article supplement (https://jnis.bmj.com/highwire/filestream/167591/field_highwire_adjunct_files/0/neurintsurg-2021-017888supp001_data_supplement.pdf)
Supplement: neurintsurg-2021-017888supp001_data_supplement.pdf [file neurintsurg-2021-017888supp001_data_supplement.pdf]

| Author             | Year | Country               | Patients | Type of Study                                    | Primary Group (n)     | Comparison Group (n)    | Major Endpoints                                       | Outcomes                                                                                                                                                                                                 | Comments                                                                                                                                                                          |
|--------------------|------|-----------------------|----------|--------------------------------------------------|-----------------------|-------------------------|-------------------------------------------------------|----------------------------------------------------------------------------------------------------------------------------------------------------------------------------------------------------------|-----------------------------------------------------------------------------------------------------------------------------------------------------------------------------------|
| Duffis et al.      | 2014 | Multiple (8 Studies)  | 2,729    | Meta-Analysis                                    | ≥ 80 years (467)      | < 80 years (2,262)      | 90DmRS, sICH, 90Dmortality, TIMI                      | ≥ 80 compared to <80: TIMI 2-3 OR = 0.814, p=0.364, sICH OR = 1.604 p=0.04, mortality OR = 3.695 p<0.001<br><80 compared to ≥80: 90dmRS<3 OR = 2.694, p<0.001                                            |                                                                                                                                                                                   |
| Parrilla et al.    | 2015 | Spain                 | 150      | Retrospective, Single Center                     | ≥ 80 years (34)       | < 80 years (116)        | TICI, sICH, PostProcedure NIHSS, 90DmRS, 90Dmortality | ≥ 80: TICI ≥ 2b =88.2%, sICH = 5.9%, PostProcedureNIHSS = 9.7, 90DmRS<3 =13.8%, mortality = 35.2%<br>< 80: TICI ≥ 2b = 93.9%, sICH = 2.6%, PostProcedureNIHSS = 6.5, 90DmRS<3 = 56.9%, mortality = 17.2% |                                                                                                                                                                                   |
| Hwang et al.       | 2015 | Korea                 | 156      | Retrospective, Single Center                     | > 80 years +EVT (56)  | > 80 years NO EVT (100) | 90DmRS, 1yrRS, sICH, 90Dmortality                     | EVT: 90DmRS<3 = 35.7%, 1yrRS = 35.7%, sICH = 10.7%, mortality = 12.5%<br>NO EVT: 90DmRS<3 = 11%, 1yrRS = 14%, sICH = 2%, mortality = 8%                                                                  | EVT patients also had reduced in-hospital morbidity, measured via infections, etc.                                                                                                |
| Goyal et al.       | 2016 | Multiple (5 Trials)   | 198      | Retrospective Analysis of Prospective Trial Data | ≥ 80 years +EVT (107) | ≥ 80 years NO EVT (91)  | 90DmRS, 90Dmortality                                  | ≥ 80 +EVT vs. NO EVT: mortality = 28% versus 45%, 90DmRS<2 OR = 3.68                                                                                                                                     |                                                                                                                                                                                   |
| Khan et al.        | 2017 | USA                   | 193      | Retrospective, Multiple (2) Centers              | ≥ 90 years (18)       | < 90 years (175)        | 90DmRS                                                | ≥ 90: 90DmRS<3 = 11%<br>< 90: 90DmRS<3 = 48%                                                                                                                                                             | Older age, higher initial NIHSS, and lower degree of recanalization independent predictors of poor outcome                                                                        |
| Mohlenbruch et al. | 2017 | Germany               | 29       | Retrospective, Single Center                     | ≥ 90 years (29)       | None                    | TICI, 90DmRS                                          | TICI ≥ 2b = 75.9%, 90DmRS < 3 = 17.2%                                                                                                                                                                    | Low complication rate (only 1 minor), so suggest not excluding the elderly from MT                                                                                                |
| Alawieh et al.     | 2018 | USA                   | 1,346    | Retrospective, Multiple (7) Centers              | ≥ 80 years (346)      | < 80 years (1,000)      | TICI, sICH, 90DmRS                                    | < 80: TICI ≥ 2b = 88%, sICH = 4%, 90DmRS<3 =44%<br>≥ 80: TICI > 2b = 88%, sICH = 7%, 90DmRS<3 = 21%                                                                                                      | Age ≥ 80 independently predicted increased mortality and poor outcome, regardless of technique (ADAPT versus SOLUMBRA), location (anterior versus posterior circulation), or TICI |
| Hilditch et al.    | 2018 | Multiple (17 Studies) | 860      | Systematic Review and Meta-Analysis              | ≥ 80 years (860)      | None                    | TICI, sICH, 90DmRS < 3                                | TICI ≥ 2b = 78%, sICH = 8%, 90DmRS<3 = 27%                                                                                                                                                               |                                                                                                                                                                                   |

|                 |      |          |     |                                                                  |                                            |                                             |                                                      |                                                                                                                                                                              |                                                                                                                                                                                                                 |
|-----------------|------|----------|-----|------------------------------------------------------------------|--------------------------------------------|---------------------------------------------|------------------------------------------------------|------------------------------------------------------------------------------------------------------------------------------------------------------------------------------|-----------------------------------------------------------------------------------------------------------------------------------------------------------------------------------------------------------------|
| Wu et al.       | 2019 | China    | 23  | Retrospective, Multiple (2) Centers                              | ≥ 90 years +EVT (14)                       | ≥ 90 years NO EVT (9)                       | PostProcedure NIHSS, 90DmRS, 90Dmortality, sICH      | EVT: PostProcedure NIHSS = 0, 90DmRS<3 = 71.4%, 90Dmortality = 28.6%, sICH = 0%<br>NO EVT: PostProcedure NIHSS = 12, 90DmRS<3 = 44.4%, 90Dmortality = 33.3%, sICH = 33.3%    |                                                                                                                                                                                                                 |
| Sussman et al.  | 2019 | USA      | 108 | Retrospective, Single Center                                     | 90-99 years (29)                           | 80-89 years (79)                            | TICI, sICH, 90DmRS<3, 90Dmortality                   | >90: TICI ≥2b = 79%, 90DmRS<3 = 12.5%, sICH = 21.4%, 90Dmortality = 63%<br>>80: TICI >2b = 79%, 90DmRS<3 = 19.7%, sICH = 6.4%, 90Dmortality = 40.9%                          |                                                                                                                                                                                                                 |
| Meyer et al.    | 2019 | Germany  | 79  | Retrospective, Multiple (3) Centers                              | ≥ 90 years (79)                            | None                                        | TICI, TTR, sICH, 90DmRS                              | TICI ≥ 2B = 69.6%, TTR = 39 min, sICH = 5.1%, 90DmRS < 3 = 16%                                                                                                               | No predictors of good outcome in subgroup analysis                                                                                                                                                              |
| Kawabata et al. | 2019 | Japan    | 59  | Retrospective, Single Center                                     | ≥ 80 years (19)                            | < 80 years (40)                             | TICI, 90DmRS, 90Dmortality                           | ≥ 80: TICI ≥2b = 89.5%, 90DmRS < 3 or stable from preOP = 47.4%, 90Dmortality = 21.1%<br>> 80: TICI >2b = 67.5%, 90DmRS < 3 or stable from preOP = 45%, 90Dmortality = 27.5% | IV tPA, TICI ≥ 2b, and out of hospital onset independent predictors of good outcome                                                                                                                             |
| Majidi et al.   | 2020 | USA      | 113 | Retrospective, Single Center                                     | ≥ 80 years (113)                           | None                                        | TICI, TTR, sICH, 90DmRS<3 (Good Outcome)             | TICI ≥ 2B = 89%, TTR = 53 min, sICH = 5%, 90DmRS < 3 = 22% (those with mRS < 3 baseline), and stable = 32%                                                                   | Subgroup analysis of those with favorable outcomes at 90D (16) compared to those with unfavorable (56), only difference was baseline NIHSS (14 versus 19, p = 0.03). Anesthesia subtype did not affect outcomes |
| Pinto et al.    | 2020 | Portugal | 144 | Retrospective, Single Center                                     | ≥ 90 years (16)                            | ≥ 80 years, < 90 years (128)                | TICI, TTR, sICH, 90DmRS<3 (Good Outcome)             | > 90: TICI ≥ 2b = 81.3%, sICH = 6.3%, 90DmRS<3 = 31.3%<br>>80: TICI ≥ 2b = 87.5%, sICH = 3.1%, 90DmRS<3 = 22.6%                                                              | No significant differences between 2 groups                                                                                                                                                                     |
| Agarwal et al.  | 2020 | USA      | 205 | Retrospective, Single Center                                     | ≥ 90 years (46, 39 included in propensity) | ≤ 69 years (159, 39 included in propensity) | Good discharge disposition (home, rehab), sICH, TICI | ≥ 90: good discharge = 44%, sICH = 2.6%, TICI ≥ 2b = 90%<br>≤ 69: good discharge = 51%, sICH = 10.3%, TICI > 2b = 90%                                                        | Used propensity score matching to account for confounders. No major differences between the groups                                                                                                              |
| Meyer et al.    | 2020 | Germany  | 203 | Retrospective, Multiple (3) Centers, Plus National Registry Data | ≥ 90 years (203)                           | None                                        | TICI, sICH, 90DmRS≤3 (Good Outcome)                  | TICI ≥ 2b = 75.9%, sICH = 3%, 90DmRS ≤ 3 = 21.6%, mortality = 27.1, 90D mortality = 48.9%                                                                                    | ASPECT score and NIHSS independent predictors of good outcome                                                                                                                                                   |
| Andrews et al.  | 2020 | USA      | 403 | Retrospective, Single Center                                     | 80-89 (86), and ≥ 90 years (14)            | <80 years (303)                             | TICI, mortality, dischargemRS                        | <80: TICI ≥ 2b = 87.1%, mortality = 11.8%, sICH = 10.9%, dischargemRS≤2 =                                                                                                    | No differences between groups                                                                                                                                                                                   |

|                |      |                                            |       |                                                                                                             |                                                  |                                                                                                                                                                                                                                                                                                                                                                  |                                        |                                                                                                                                                                                                                                                                                                                                                                                                                                                                                                                                                                  |                                                                                                                                      |
|----------------|------|--------------------------------------------|-------|-------------------------------------------------------------------------------------------------------------|--------------------------------------------------|------------------------------------------------------------------------------------------------------------------------------------------------------------------------------------------------------------------------------------------------------------------------------------------------------------------------------------------------------------------|----------------------------------------|------------------------------------------------------------------------------------------------------------------------------------------------------------------------------------------------------------------------------------------------------------------------------------------------------------------------------------------------------------------------------------------------------------------------------------------------------------------------------------------------------------------------------------------------------------------|--------------------------------------------------------------------------------------------------------------------------------------|
|                |      |                                            |       |                                                                                                             |                                                  |                                                                                                                                                                                                                                                                                                                                                                  |                                        | 34.7%<br>80-89: TICI > 2b = 84.9%,<br>mortality = 8.1%, sICH = 7%,<br>dischargemRS ≤ 2 = 18.6%<br>≥ 90: TICI > 2b = 100%,<br>mortality = 7.1%, sICH = 7.7%,<br>dischargemRS ≤ 2 = 28.6%                                                                                                                                                                                                                                                                                                                                                                          | after multivariate<br>modeling                                                                                                       |
| Janssen et al. | 2020 | Belgium,<br>Switzerland,<br>Canada, Sweden | 112   | Retrospective,<br>Multiple (3) Centers,<br>Plus National<br>Registry Data                                   | ≥ 90 years (112)                                 | None                                                                                                                                                                                                                                                                                                                                                             | TICI, 90Dmortality,<br>90DmRS          | TICI ≥ 2b = 74.6%,<br>90Dmortality = 62.3%,<br>90DmRS < 3 = 16.4%                                                                                                                                                                                                                                                                                                                                                                                                                                                                                                | younger age and<br>lower pre-stroke<br>mRS independent<br>predictors of good<br>clinical outcomes                                    |
| Ahn et al.     | 2020 | Korea                                      | 82    | Retrospective, Single<br>Center                                                                             | ≥ 80 years (82)                                  | None                                                                                                                                                                                                                                                                                                                                                             | 90DmRS                                 | 90DmRS ≤ 3 = 42.7%                                                                                                                                                                                                                                                                                                                                                                                                                                                                                                                                               | Subgroup analysis of<br>patients showed<br>higher likelihood of<br>poor outcome with<br>lower ASPECT and<br>longer procedure<br>time |
| Ospel et al.   | 2020 | Netherlands                                | 3,279 | Retrospective<br>analysis of<br>Prospectively<br>collected data,<br>National Registry,<br>Subgroup Analysis | ASPECT 6-10, ≥<br>71.8 years, TICI<br>≥ 2b (799) | ASPECT 6-10, <<br>71.8 years, TICI ≥<br>2b (832)<br>ASPECT 6-10, <<br>71.8 years, TICI <<br>2b (468)<br>ASPECT 6-10,<br>≥ 71.8 years, TICI<br>< 2b (548)<br>ASPECT 0-5, ≥<br>71.8 years, TICI <<br>2b (42)<br>ASPECT 0-5, ><br>71.8 years, TICI ≥<br>2b (60)<br>ASPECT 0-5, <<br>71.8 years, TICI <<br>2b (69)<br>ASPECT 0-5, <<br>71.8 years, TICI ≥<br>2b (70) | 90DmRS                                 | ASPECT 6-10, ≥ 71.8 years,<br>TICI ≥ 2b (799): 90DmRS < 3 =<br>34.8% ASPECT 6-10, <<br>71.8 years, TICI ≥ 2b (832):<br>90DmRS < 3 = 67.7%<br>ASPECT 6-10, < 71.8 years,<br>TICI < 2b (468): 90DmRS < 3 =<br>39.3% ASPECT 6-10, ≥ 71.8<br>years, TICI < 2b (548):<br>90DmRS < 3 = 17.2%<br>ASPECT 0-5, ≥ 71.8 years, TICI<br>< 2b (42): 90DmRS < 3 = 14.3%<br>ASPECT 0-5, ≥ 71.8 years, TICI<br>≥ 2b (60): 90DmRS < 3 = 15.1%<br>ASPECT 0-5, < 71.8 years, TICI<br>< 2b (69): 90DmRS < 3 = 16%<br>ASPECT 0-5, < 71.8 years, TICI<br>≥ 2b (70): 90DmRS < 3 = 34.3% | Benefit in all groups,<br>regardless of age or<br>ASPECT                                                                             |
| Zhao et al.    | 2020 | Multiple (16<br>Studies)                   | 3,954 | Systematic Review<br>and Meta-Analysis                                                                      | ≥ 80 years<br>(1,059)                            | < 80 years (2,895)                                                                                                                                                                                                                                                                                                                                               | 90DmRS,<br>90Dmortality, sICH,<br>TICI | ≥ 80 compared to < 80:<br>90DmRS < 3 OR = 0.40 p<br>< 0.001, mortality OR = 2.26<br>p < 0.001, sICH OR = 1.28<br>p = 0.18, TICI ≥ 2b OR = 0.72<br>p = 0.72                                                                                                                                                                                                                                                                                                                                                                                                       | Better outcomes<br>noted for studies<br>published between<br>2017 and 2019<br>compared to earlier                                    |
| Bai et al.     | 2021 | Multiple (13<br>Studies)                   | 657   | Systematic Review<br>and Meta-Analysis                                                                      | ≥ 90 years (657)                                 | None                                                                                                                                                                                                                                                                                                                                                             | 90DmRS,<br>90Dmortality, sICH,<br>TICI | 90DmRS < 2 = 21.6%, TICI ≥ 2b<br>= 80.82%, 90Dmortality =<br>44.38%, sICH = 3.52%                                                                                                                                                                                                                                                                                                                                                                                                                                                                                |                                                                                                                                      |
| Fujita et al.  | 2021 | Japan                                      | 150   | Retrospective<br>Analysis of<br>Prospective National<br>Registry Data (46<br>centers)                       | ≥ 90 years +EVT<br>(49)                          | ≥ 90 years NO<br>EVT (101)                                                                                                                                                                                                                                                                                                                                       | 90DmRS, sICH                           | EVT: 90DmRS < 3 or stable to<br>prestroke = 28.6%, , sICH = 0%<br>NO EVT: 90DmRS < 3 or stable<br>to prestroke = 6.9%, , sICH =<br>3.9%                                                                                                                                                                                                                                                                                                                                                                                                                          | EVT group had<br>significantly higher<br>ASPECT, shorter time<br>to LKW, and more<br>frequent IV tPA, all                            |

|  |  |  |  |  |  |  |  |  |                                  |
|--|--|--|--|--|--|--|--|--|----------------------------------|
|  |  |  |  |  |  |  |  |  | may have<br>confounded analysis. |
|--|--|--|--|--|--|--|--|--|----------------------------------|
